# Supplementary material for: The Role of Eccentric Strength in 180° Turns in Female Soccer Players
Source: Sports (Basel). 2017 Jun 17;5(2):42. doi: 10.3390/sports5020042 (PMC5968983; doi:10.3390/sports5020042)
Supplement: Supplementary file 1 [file sports-05-00042-s001.pdf]

# Supplementary Materials: The Role of Eccentric Strength in 180° Turns in Female Soccer Players

Paul A. Jones, Christopher Thomas, Thomas Dos'Santos, John J. McMahon and Philip Graham-Smith

**Table S1.** Differences in performance time and velocity profile variables between stronger and weaker subjects based on relative eccentric knee flexor scores.

| Variable                                                 | Strong ( <i>n</i> = 9) | Weak ( <i>n</i> = 9) | <i>p</i> | <i>d</i> |
|----------------------------------------------------------|------------------------|----------------------|----------|----------|
| Performance Time (s)                                     | 2.63 ± 0.12            | 2.71 ± 0.13          | 0.247    | -0.64    |
| Eccentric Knee Flexor Peak Torque (Nm·kg <sup>-1</sup> ) | 1.87 ± 0.21            | 1.40 ± 0.14          | <0.001   | 2.63     |
| Approach velocity (m·s <sup>-1</sup> ) <sup>1</sup>      | 3.96 ± 0.21            | 3.79 ± 0.28          | 0.732    | 0.69     |
| ΔPEN (m·s <sup>-1</sup> ) <sup>2</sup>                   | -1.52 ± 0.16           | -1.40 ± 0.24         | 0.269    | -0.59    |
| ΔFIN (m·s <sup>-1</sup> ) <sup>3</sup>                   | -2.20 ± 0.18           | -2.10 ± 0.29         | 0.233    | -0.41    |
| ΔPEN-FIN (m·s <sup>-1</sup> ) <sup>4</sup>               | -3.72 ± 0.23           | -3.50 ± 0.36         | 0.137    | -0.73    |

<sup>1</sup>Approach velocity is defined as the horizontal model center of mass velocity at the start of penultimate contact. <sup>2</sup>change in velocity from start of penultimate contact to start of final contact. <sup>3</sup>Change in horizontal velocity from start of final contact to end of weight acceptance phase of final contact. <sup>4</sup>Change in velocity from start of penultimate contact to end of weight acceptance phase of final contact.

**Table S2.** Kinetic differences between stronger and weaker subjects based on relative eccentric knee flexor scores.

| Variable                                                | Strong ( <i>n</i> = 9) | Weak ( <i>n</i> = 9) | <i>p</i> | <i>d</i> |
|---------------------------------------------------------|------------------------|----------------------|----------|----------|
| Ground Reaction Forces                                  |                        |                      |          |          |
| Peak VGRF during Penultimate contact (bw)               | 3.40 ± 0.60            | 3.09 ± 0.65          | 0.308    | 0.50     |
| Ave VGRF during Penultimate contact (bw)                | 0.76 ± 0.09            | 0.78 ± 0.06          | 0.199    | -0.26    |
| Peak HGRF during Penultimate contact (bw)               | -2.05 ± 0.35           | -1.89 ± 0.51         | 0.441    | -0.37    |
| Ave HGRF during Penultimate contact (bw)                | -0.50 ± 0.08           | -0.48 ± 0.08         | 0.534    | -0.25    |
| Peak VGRF during Final contact (bw)                     | 3.01 ± 0.44            | 2.78 ± 0.72          | 0.433    | 0.39     |
| Ave VGRF during Final contact (bw)                      | 1.35 ± 0.09            | 1.28 ± 0.14          | 0.170    | 0.59     |
| Peak HGRF during Final contact (bw)                     | -2.00 ± 0.24           | -1.80 ± 0.46         | 0.452    | -0.55    |
| Ave HGRF during Final contact (bw)                      | -0.95 ± 0.10           | -0.84 ± 0.15         | 0.085    | -0.86    |
| Joint Moments                                           |                        |                      |          |          |
| Penultimate Hip Extensor Moment (Nm·kg <sup>-1</sup> )  | -3.42 ± 0.81           | -3.06 ± 0.71         | 0.321    | -0.47    |
| Penultimate Knee Extensor Moment (Nm·kg <sup>-1</sup> ) | 3.20 ± 0.56            | 3.03 ± 0.33          | 0.440    | 0.37     |
| Final Hip Extensor Moment (Nm·kg <sup>-1</sup> )        | -2.82 ± 0.69           | -2.59 ± 0.84         | 0.523    | -0.30    |
| Final Knee Extensor Moment (Nm·kg <sup>-1</sup> )       | 2.19 ± 0.40            | 2.35 ± 0.20          | 0.294    | -0.51    |

Ave = average, VGRF = Vertical GRF, HGRF = Horizontal GRF.
